# Supplementary material for: Co-Immunization Efficacy of Recombinant Antigens against Rhipicephalus microplus and Hyalomma anatolicumTick Infestations
Source: MDPI journal article supplement (doi:10.3390/pathogens12030433), 2023-03-09
Supplement: s1 [file s1]

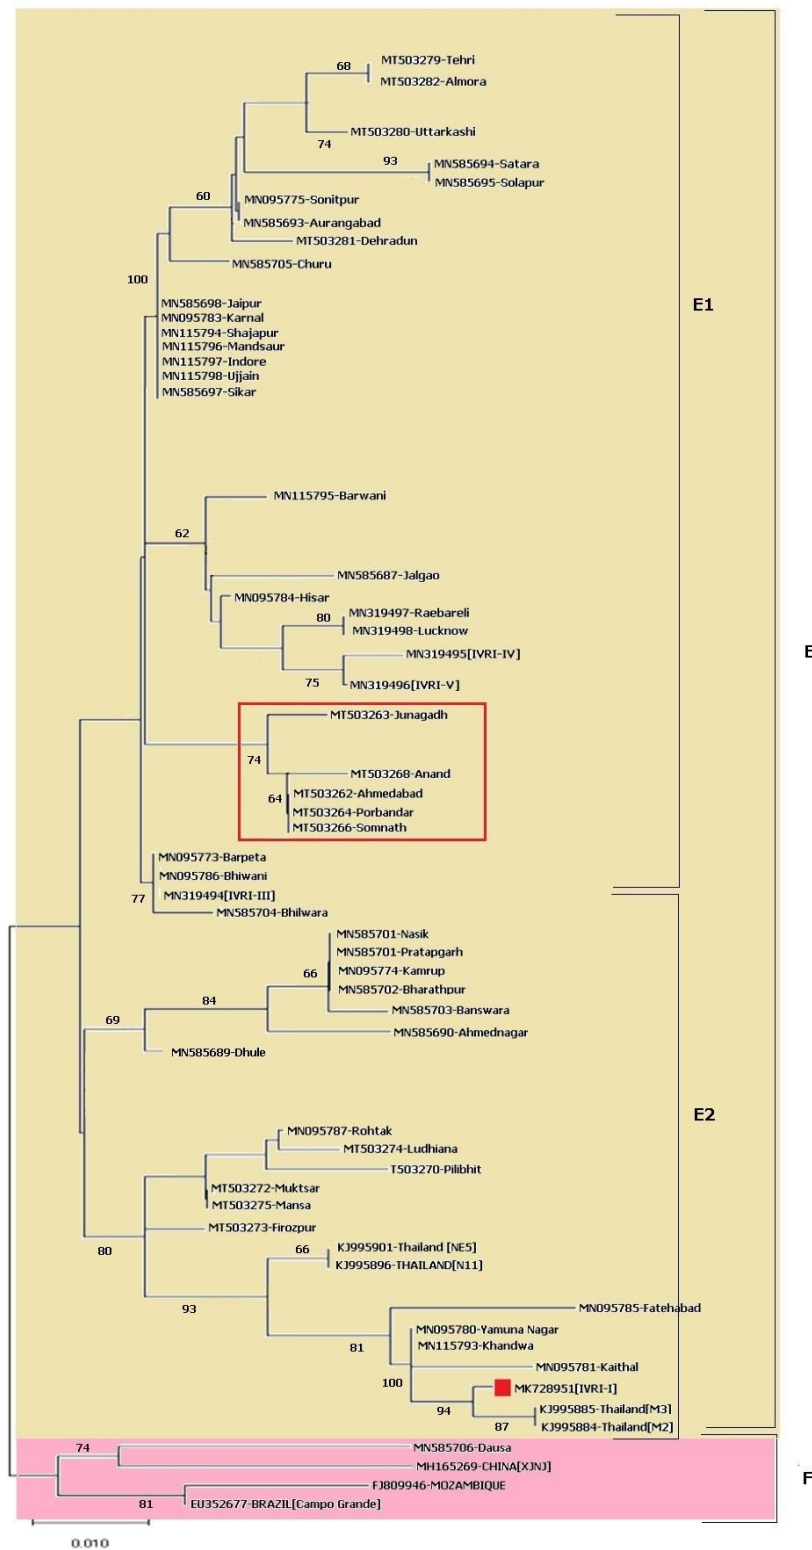

**Figure S1.** Phylogenetic analysis of different field isolates of *Rhipicephalus microplus* through maximum-likelihood method using Jones-Taylor-Thornton (JTT) model on (1000 pseudo replicates) conserved Bm86 amino acid with worldwide published vaccine strain sequences (Bootstrap values lower than 60% removed); Gujarat sequences were arranged in a group (red color box).

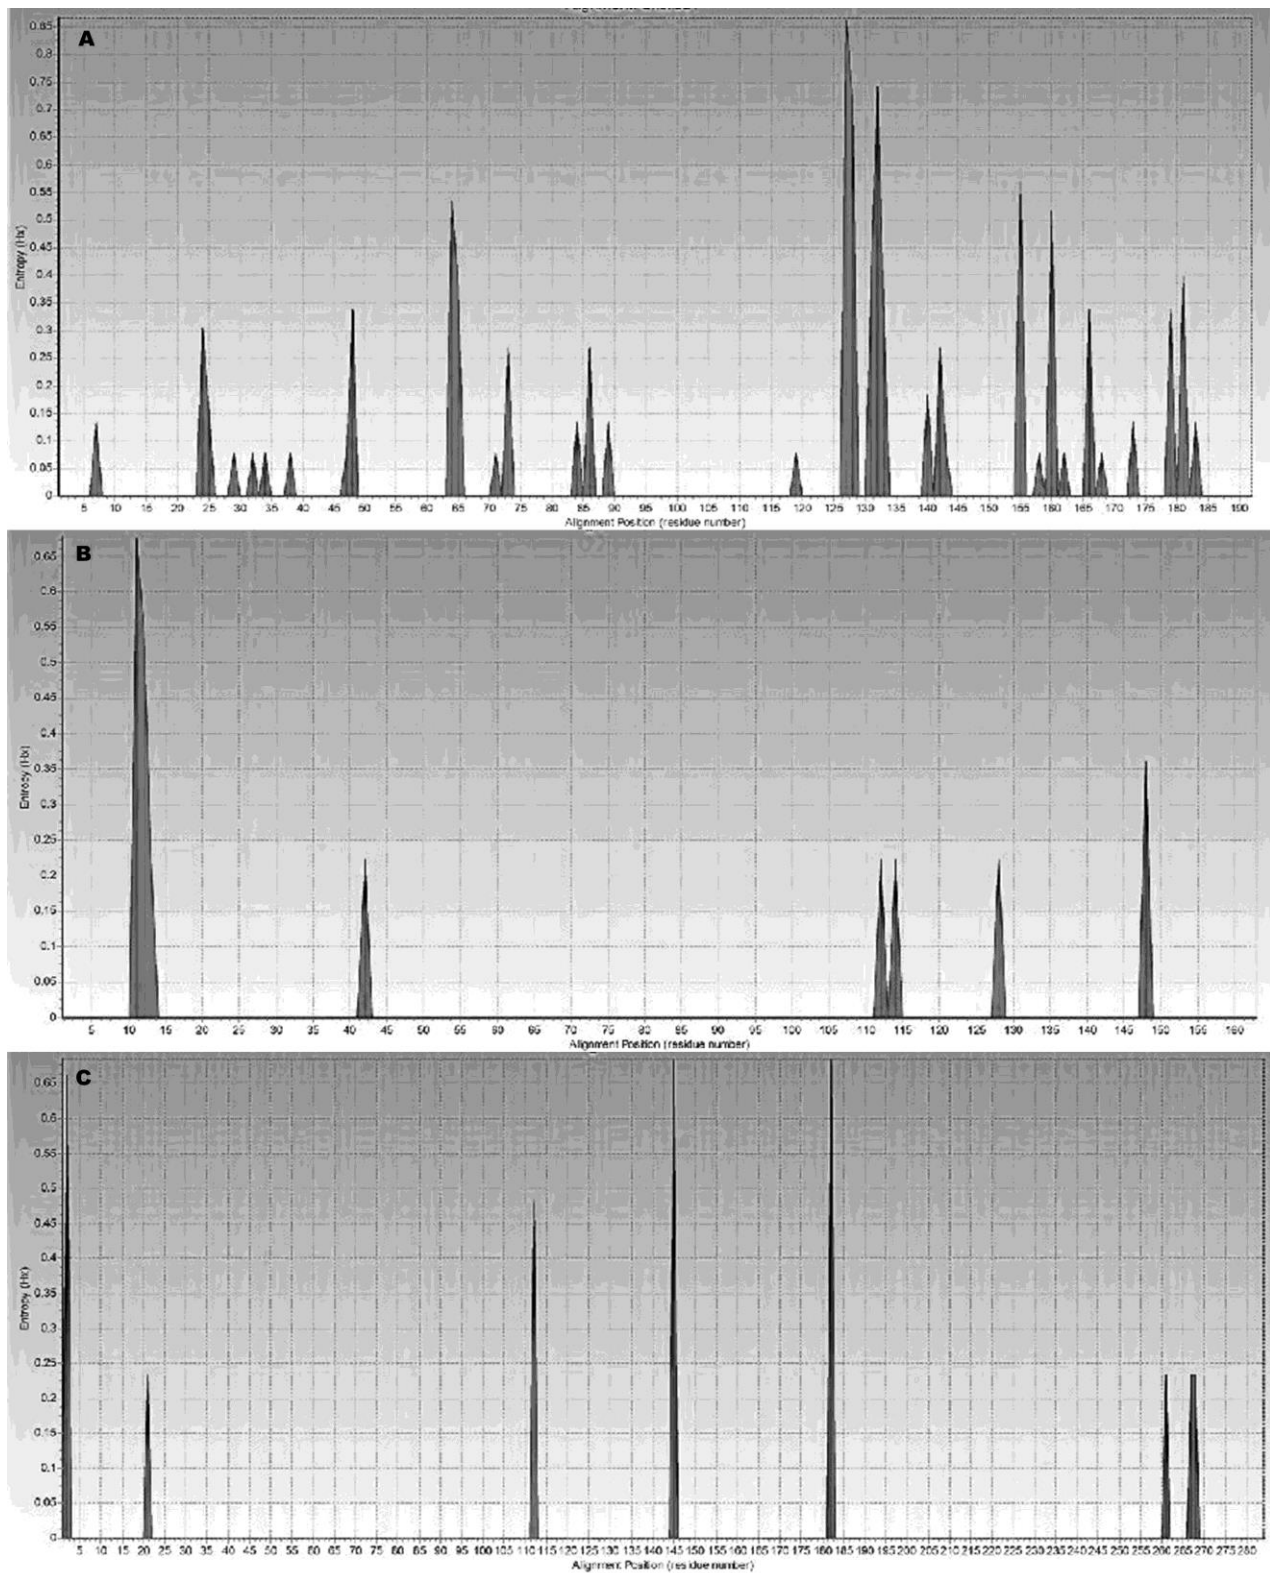

**Figure S2.** Entropy plot of **A.)** Conserved Bm86, **B.)** Subolesin (SUB) and **C.)** Tropomyosin (TPM) sequences of Indian field isolates.

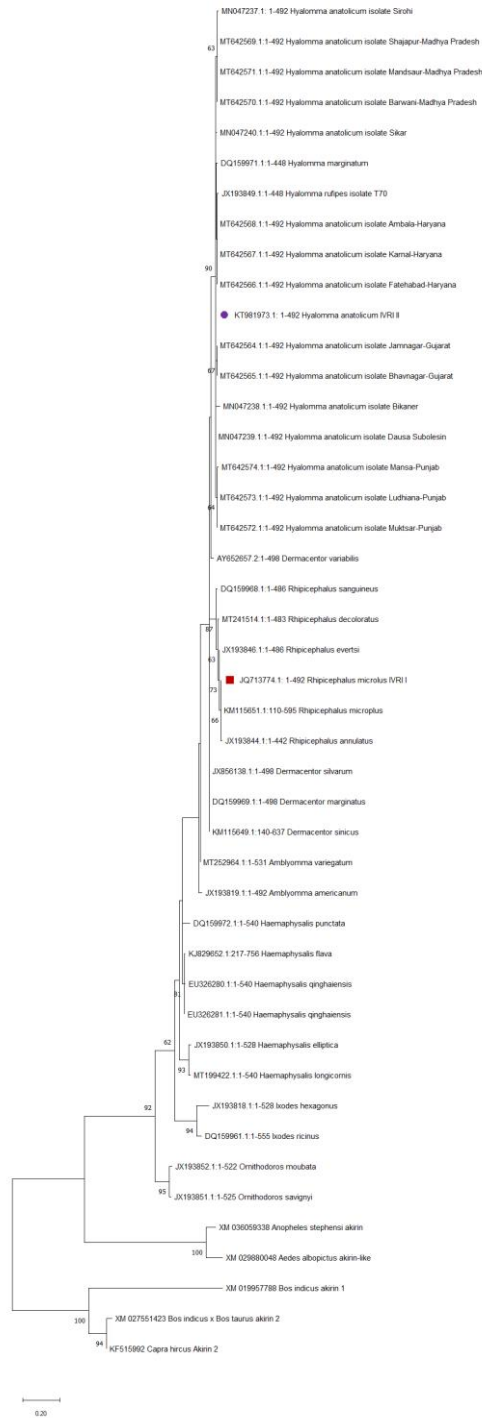

**Fig. S3. A**

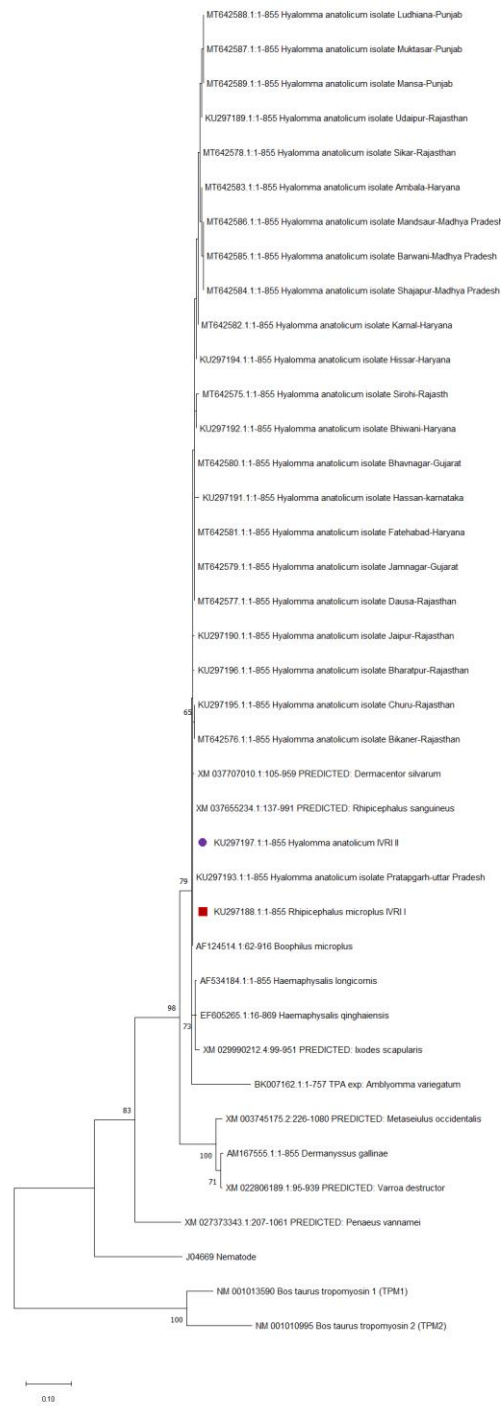

**Fig. S3. B**

**Figure S3.** Phylogenetic analysis of different isolates of *Hyalomma anatolicum* along with other ticks, arthropods and mammals on deduced amino acid sequences of (A) Subolesin (statistical Method: Maximum-likelihood; model: Jones-Taylor-Thornton (JTT) + Gamma distribution (+G) with 5 rate categories; bootstrap value:500; Neighbor-Join and BioNJ algorithms) (B) Tropomyosin (statistical Method: Maximum-likelihood; model: Le\_Gascuel\_2008 (LG) + Gamma distribution (+G) with 5 rate categories; bootstrap value:500; Neighbor-Join and BioNJ algorithms). (Bootstrap values lower than 60% removed).

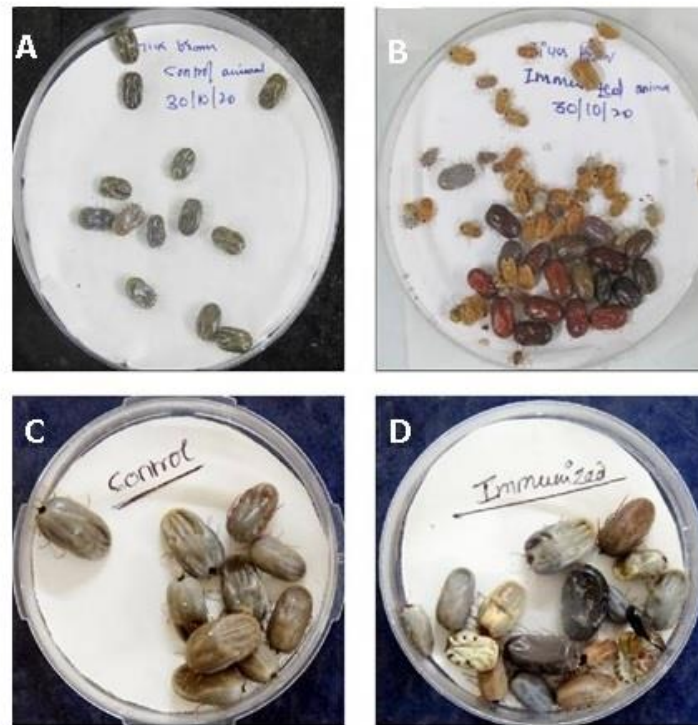

**Figure S4.** Representative sample of ticks dropped from immunized animals compared to control animals. **A.)** *Hyalomma anatolicum* female dropped from control animals; **B.)** *H. anatolicum* female dropped from immunized animals; **C.)** *Rhipicephalus microplus* female ticks dropped from control animals; and **D.)** *R. microplus* female ticks dropped from immunized animals.

**Table S1.** Details of PCR primer used in the experiment

| Genes                            | Primer sequence (5′→3′)                             | Length | Amplicon size(bp) | Use                                                                                           |
|----------------------------------|-----------------------------------------------------|--------|-------------------|-----------------------------------------------------------------------------------------------|
| Full length<br>Bm86 gene         | Atgcgtggcatcgctttatt                                | 20     | 1953              | Full length                                                                                   |
|                                  | gtttagcccaactatctttatttgacatc                       | 22     |                   |                                                                                               |
| Bm86 gene<br>conserved sequence  | Tgcgacagtctgctcaagaat                               | 21     | 578               | For cloning,<br>sequencing and<br>gene conservation<br>study                                  |
|                                  | Gctgcagcacttgactttcca                               | 21     |                   |                                                                                               |
| SUB ( <i>H.<br/>anatolicum</i> ) | Gaaatcctacgcaccaatg                                 | 20     | 492               |                                                                                               |
|                                  | ttagacgagtgggtagctggc                               | 21     |                   |                                                                                               |
| TPM ( <i>H.<br/>anatolicum</i> ) | atgga(g/t)gccatcaagaa(g/a)aa(g/a)atgcag             | 26     | 901               |                                                                                               |
|                                  | gagcagcggtrgaaacaacggc                              | 22     |                   |                                                                                               |
| Bm86                             | aggctcgagaaaagaatgcgtggcatcgctttgttc                | 36     | 2                 |                                                                                               |
|                                  | Agggcggccgcttatgcataatctggaacatcatatggataatacaacga  | 62     |                   |                                                                                               |
|                                  | tgctgcggtgac                                        |        |                   |                                                                                               |
| TPM                              | aggccatggaaaagaatggaggccatcaagaaaagatgcag           | 42     | 911               | For expression of<br>gene in eukaryotic<br>system (Primers<br>with vector flanking<br>region) |
|                                  | Aggggatccttatgcataatctggaacatcatatggataatagtagccagt | 66     |                   |                                                                                               |
|                                  | gagttcggagaaggt                                     |        |                   |                                                                                               |
| SUB                              | aggctcgagaaaagaatggcttgctgcgacattaaag               | 36     | 548               |                                                                                               |
|                                  | Agggcggccgcttatgcataatctggaacatcatatggataatacgacaa  | 62     |                   |                                                                                               |
|                                  | atagctgggcgt                                        |        |                   |                                                                                               |
| Bm86                             | Gaggatcgtgttttgaagc                                 | 20     | 133               | For gene<br>quantification<br>(qPCR)                                                          |
|                                  | Tctgagcacgtgtttgac                                  | 20     |                   |                                                                                               |
| EF 1-alpha                       | cgtctacaagattggtggcatt                              | 22     | 109               |                                                                                               |
|                                  | Ctcagtggtcaggttggcag                                | 20     |                   |                                                                                               |
| GAPDH                            | agt ccaccggcg tcttctca                              | 21     | 123               |                                                                                               |
|                                  | gtgtggttcacacccatcacao                              | 22     |                   |                                                                                               |

**Table S2.** Field samples of *R. microplus* and *H. anatolicum* collected from different parts of India

| States                                | Districts                                                                                                         | Total samples |
|---------------------------------------|-------------------------------------------------------------------------------------------------------------------|---------------|
| <i>R. microplus</i> collection areas  |                                                                                                                   |               |
| Assam                                 | Nagaon, Barpeta, Kamrup, Sonitpur, Morigaon and Dibrugarh                                                         | 6             |
| Haryana                               | Panipat, Kurukshetra, Yamuna Nagar, Kaithal, Ambala, Karnal, Hisar, Fatehabad, Bhiwani, Rohtak and Sonipat        | 11            |
| Rajasthan                             | Alwar, Sikar, Churu, Jaipur, Pratapgadh, Bhilwara, Banswara, Udaipur, Chittorgarh, Dungarpur, Dausa and Bharatpur | 12            |
| Punjab                                | Muktsar, Ludhiana, Mansa, Moga and Firozpur                                                                       | 5             |
| Gujarat                               | Ahmedabad, Jungadh, Porbandar, Jamnagar, Somnath, Bhavnagar and Anand                                             | 7             |
| Uttar Pradesh                         | IVRI-I, IVRI-III, IVRI-IV, IVRI-V, Lucknow, Raebareli and Pilibhit                                                | 7             |
| Uttarakhand                           | Haridwar, Newtehri, Uttarakashi, Dehradun, Almora and Mukteshwar                                                  | 6             |
| Maharashtra                           | Jalgaon, Nashik, Dhule, Ahmadnagar, Raigarh, Pune, Aurangabad, Satara and Solapur                                 | 9             |
| Madhya Pradesh                        | Khandwa, Shajapur, Barwani, Mandsaur, Ujjain and Indore                                                           | 6             |
| <i>H. anatolicum</i> collection areas |                                                                                                                   |               |
| Rajasthan                             | Sikar, Bikaner, Dausa and Sirohi                                                                                  | 4             |
| Gujarat                               | Jamnagar and Bhavnagar                                                                                            | 2             |
| Haryana                               | Fatehabad, Karnal, Ambala                                                                                         | 3             |
| Madhya Pradesh                        | Shajapur, Barwani and Mandsaur                                                                                    | 3             |
| Punjab                                | Muktsar, Ludhiana and Mansa                                                                                       | 3             |

**Table S3.** The ratio of IgG to IgG1 and IgG2; and IgG1 to IgG2 responses against different recombinants proteins after immunization

| Days of Post Primary Immunization (PPI) | Immunization with rBm86 |          |           | Immunization with rTPM |          |           | Immunization with rSUB |          |           |
|-----------------------------------------|-------------------------|----------|-----------|------------------------|----------|-----------|------------------------|----------|-----------|
|                                         | IgG:IgG1                | IgG:IgG2 | IgG1:IgG2 | IgG:IgG1               | IgG:IgG2 | IgG1:IgG2 | IgG:IgG1               | IgG:IgG2 | IgG1:IgG2 |
| 15 <sup>th</sup> day PPI                | 1.5:1                   | 3.3:1    | 2.1:1     | 1.17:1                 | 2.05:1   | 1.75:1    | 1.07:1                 | 1.95:1   | 1.81:1    |
| 75 <sup>th</sup> day PPI                | 1:1                     | 2.6:1    | 2.5:1     | 0.93:1                 | 1.51:1   | 1.6:1     | 0.99:1                 | 1.3826:1 | 1.3844:1  |
| 120 <sup>th</sup> day PPI               | 0.98:1                  | 1.8:1    | 1.9:1     | 0.89:1                 | 1.67:1   | 1.8:1     | 1.03:1                 | 1.49:1   | 1.44:1    |
